# Supplementary material
Source: publisher figshare collection journal article supplement (https://acs.figshare.com/ndownloader/files/14345921)
Supplement: Supplementary file 1 [file 14345921]

Compounds	ID,SMILES	Ki/hCPA1 (nM)	Ki/hCPA2 (nM)	Ki/hCPA4 (nM)	Ki/hCPB1 (nM)	Ki/hCPD (nM)	Ki/rat CPA3 (nM)	Ki/hCPU (nM)	Ki/hCPN (nM)	Ki/hCCP1 (nM)	Ki/hCCP6 (nM)	Ki/MMP9 (nM)	Ki/MMP10 (nM)	Ki/MMP12 (nM)	Ki/MMP13 (nM)	Ki/pPepsin (nM)	Ki/Papain (nM)	Ki/bTryspsin (nM)	Ki/hTrombin (nM)	Ki/hNElastase (nM)
1	O=P(C[C@H](C(O)=O)CC1=CC=CC=C1)(O)[C@@H](NC([C@H](CC(C)C)NC(C)=O)=O)CC2=CC=CC=C2	0.04	1	0.39	0.12	NI
2	O=P(C[C@H](C(O)=O)CCC1=CC=CC=C1)(O)[C@@H](NC([C@H](CC(C)C)NC(C)=O)=O)CC2=CC=CC=C2	0.08	0.2	1.9	NI	NI
3	C[C@H](NC([C@H](CC(C)C)NC(C)=O)=O)P(C[C@H](C(O)=O)CCC1=CC=CC=C1)(O)=O	0.17	0.7	3.7	NI	NI
4	C[C@H](NC([C@H](CCC(O)=O)NC(C)=O)=O)P(C[C@H](C(O)=O)CCC1=CC=CC=C1)(O)=O	3.1	4.6	38.6	NI	NI
5	C[C@H](NC([C@H](CCCCN)NC(C)=O)=O)P(C[C@H](C(O)=O)CCC1=CC=CC=C1)(O)=O	1.2	2.4	25.4	NI	NI
6	C[C@H](NC([C@H](CO)NC(C)=O)=O)P(C[C@H](C(O)=O)CCC1=CC=CC=C1)(O)=O	5.9	13.8	60.6	NI	NI
7	C[C@H](NC([C@H]1N(C(C)=O)CCC1)=O)P(C[C@H](C(O)=O)CCC2=CC=CC=C2)(O)=O	1.7	3.2	7.5	NI	NI
8	C[C@H](NC([C@H](CC1=CC=C(O)C=C1)NC(C)=O)=O)P(C[C@H](C(O)=O)CCC2=CC=CC=C2)(O)=O	0.11	1.7	4.7	NI	NI
9	C[C@H](NC([C@H](CC1=CC=C(O)C=C1)NC(COCCOCCN)=O)=O)P(C[C@H](C(O)=O)CCC2=CC=CC=C2)(O)=O	0.5	7.8	5.4	NI	NI
10	C[C@H](NC([C@H](CC1=CC=C(O)C=C1)NC(COCCOCCNC(C)=O)=O)=O)P(C[C@H](C(O)=O)CCC2=CC=CC=C2)(O)=O	0.4	5.7	3.5	NI	NI
11	C[C@H](NC([C@H](CC1=CC=C(O)C=C1)NC(COCCOCCNC(CCOCCOCCOCCNC(CCC2=CC=C(C(/C=C/C3=[N+](CCCCS(=O)([O-])=O)C4=C(C(C=C(S(=O)(O)=O)C=C5S(=O)(O)=O)=C5C=C4)C3(C)C)=C\C=C6N(CCCCS(=O)(O)=O)C(C=CC7=C8C=C(S(=O)(O)=O)C=C7S(=O)(O)=O)=C8C\6(C)C)C=C2)=O)=O)=O)=O)P(C[C@H](C(O)=O)CCC9=CC=CC=C9)(O)=O	0.4	5.3	3.7	NI	NI	0.02	NI	NI	NI	NI	2588	983	1340	562	NI	NI	NI	NI	NI
NI= No inhibitory activity from 1 nM to 1 mM
